# Supplementary material for: Where will it end? Pathways to care and catastrophic costs following negative TB evaluation in Uganda
Source: PubMed Central journal article supplement (PMC8284677; doi:10.1371/journal.pone.0253927), 2021-07-16
Supplement: pone.0253927.s001.pdf [file pone.0253927.s001.pdf]

| Variable                                                                    |                                                   | Adjusted OR | 95%CI        | Significance |
|-----------------------------------------------------------------------------|---------------------------------------------------|-------------|--------------|--------------|
| Number of times<br>healthcare facility<br>visited prior to TB<br>evaluation | 0 – 3 times                                       | 1           |              | 0.06         |
|                                                                             | 4+ times                                          | 5.16        | 0.96 – 27.76 |              |
| Living<br>Environment                                                       | Urban/Peri-<br>urban                              | 1           |              | 0.02         |
|                                                                             | Rural                                             | 0.14        | 0.03 – 0.73  |              |
| Known HIV status                                                            | Negative                                          | 1           |              | 0.05         |
|                                                                             | Positive                                          | 0.19        | 0.04 – 1.00  |              |
| Symptom<br>duration                                                         | /1 week<br>increase in<br>duration of<br>symptoms | 1.10        | 1.02 – 1.20  | 0.02         |
| Age                                                                         | /year of age                                      | 0.98        | 0.92 – 1.04  | 0.5          |
| Sex                                                                         | Female                                            | 1           |              | 0.2          |
|                                                                             | Male                                              | 0.30        | 0.06-1.65    |              |
