# Supplementary material for: Where will it end? Pathways to care and catastrophic costs following negative TB evaluation in Uganda
Source: PubMed Central journal article supplement (PMC8284677; doi:10.1371/journal.pone.0253927), 2021-07-16
Supplement: pone.0253927.s002.pdf [file pone.0253927.s002.pdf]

| Variable                                                           |                                          | OR   | 95%CI        | Significance |
|--------------------------------------------------------------------|------------------------------------------|------|--------------|--------------|
| Knowledge of negative TB test result                               | Not aware                                |      |              | 0.9          |
|                                                                    | Aware                                    | 0.92 | 0.27 – 3.10  |              |
| Number of times healthcare facility visited prior to TB evaluation | 0 – 3 times                              |      |              | 0.05         |
|                                                                    | 4+ times                                 | 3.24 | 1.00 – 10.49 |              |
| Test type                                                          | Smear Microscopy                         |      |              | 0.2          |
|                                                                    | Xpert MTB/Rif                            | 4.04 | 0.44 – 37.28 |              |
| Age                                                                | /year of age                             | 0.98 | 0.95 – 1.02  | 0.4          |
| Sex                                                                | Female                                   |      |              | 0.7          |
|                                                                    | Male                                     | 0.82 | 0.28-2.46    |              |
| Living Environment                                                 | Urban/Peri-urban                         |      |              | 0.007        |
|                                                                    | Rural                                    | 0.19 | 0.05 – 0.64  |              |
| Following the NTL algorithm                                        | No                                       |      |              | 0.3          |
|                                                                    | Yes                                      | 1.94 | 0.55 – 6.88  |              |
| Mobile phone ownership                                             | No                                       |      |              | 0.4          |
|                                                                    | Yes                                      | 1.69 | 0.54 – 5.34  |              |
| Known HIV status (n=51)                                            | Negative                                 |      |              | 0.03         |
|                                                                    | Positive                                 | 0.27 | 0.08 – 0.88  |              |
| Income                                                             | ≤Median income                           |      |              | 0.5          |
|                                                                    | >Median income                           | 0.69 | 0.23 – 2.06  |              |
| Symptom duration                                                   | /1 week increase in duration of symptoms | 1.05 | 0.99 – 1.11  | 0.1          |
|                                                                    | No                                       |      |              | 0.7          |

|                                                   |     |      |           |  |
|---------------------------------------------------|-----|------|-----------|--|
| Reported cause for symptoms found post-evaluation | Yes | 0.78 | 0.26-2.34 |  |
|---------------------------------------------------|-----|------|-----------|--|
