# Supplementary material for: Where will it end? Pathways to care and catastrophic costs following negative TB evaluation in Uganda
Source: PubMed Central journal article supplement (PMC8284677; doi:10.1371/journal.pone.0253927), 2021-07-16
Supplement: pone.0253927.s003.pdf [file pone.0253927.s003.pdf]

| Variable                                                           |                                                | Total cost change (USh) | 95%CI                  | Significance |
|--------------------------------------------------------------------|------------------------------------------------|-------------------------|------------------------|--------------|
| Knowledge of negative TB test result                               | Not aware                                      |                         |                        | 0.9          |
|                                                                    | Aware                                          | -90,900                 | -1,048,100 - 866,300   |              |
| Number of times healthcare facility visited prior to TB evaluation | 0 – 3 times                                    |                         |                        | 0.2          |
|                                                                    | 4+ times                                       | 517,750                 | -340,300 – 1,375,750   |              |
| Test type                                                          | Smear Microscopy                               |                         |                        | 0.9          |
|                                                                    | Xpert MTB/Rif                                  | -114,400                | -1,475,400 – 1,246,550 |              |
| Age                                                                | /year of age                                   | -4,300                  | -33,450 – 24,800       | 0.8          |
| Sex                                                                | Female                                         |                         |                        | 0.4          |
|                                                                    | Male                                           | 434,950                 | -420,450 – 1,290,300   |              |
| Living Environment                                                 | Urban/Peri-urban                               |                         |                        | 0.4          |
|                                                                    | Rural                                          | -358,600                | -1,219,300 – 502,050   |              |
| Following the NTL algorithm                                        | No                                             |                         |                        | 0.5          |
|                                                                    | Yes                                            | 357,350                 | -640,100 – 1,354,850   |              |
| Mobile phone ownership                                             | No                                             |                         |                        | 1.0          |
|                                                                    | Yes                                            | -23,450                 | -934,250 – 887,350     |              |
| Known HIV status (n=51)                                            | Negative                                       |                         |                        | 1.0          |
|                                                                    | Positive                                       | 21,750                  | -873,700 – 917,200     |              |
| Pre-symptom household income                                       | Change/10,000 USh increase in household income | 7,400                   | 850 – 13,951           | 0.03         |

|                                                   |                                          |          |                      |     |
|---------------------------------------------------|------------------------------------------|----------|----------------------|-----|
| Symptom duration                                  | /1 week increase in duration of symptoms | 16,850   | -15,050 – 48,750     | 0.3 |
| Reported cause for symptoms found post-evaluation | No                                       |          |                      | 0.1 |
|                                                   | Yes                                      | -672,100 | -1,514,000 – 169,750 |     |
