# Supplementary material for: Where will it end? Pathways to care and catastrophic costs following negative TB evaluation in Uganda
Source: PLoS One. 2021 Jul 16;16(7):e0253927. doi: 10.1371/journal.pone.0253927 (PMC8284677; doi:10.1371/journal.pone.0253927)
Supplement: S2 File — (XLSX) [file pone.0253927.s005.xlsx]

## Sheet: WWIE Data Set Cleaned for Analy
Study ID	trace_result	int_method	int_id	age	sex	location	mortality_status	mobile_phone	beforetest_num	beforetest_provider	beforetest_provider_other	test_location	fu_length	test_type	result_known	presenting_symp-cough	presenting_symp-sob	presenting_symp-fever	presenting_symp-wghtloss	presenting_symp-nsweats	presenting_symp-chestpain	presenting_symp-flu	presenting_symp-haempt	presenting_symp-symp_other	symp_other_what	symp_weeks	tb_posttest	hiv_known	hiv_status_question	hiv_status_data	posttest_advice	posttest_number	posttest_further_ix	posttest_inv_treat-cxr	posttest_inv_treat-doctor	posttest_inv_treat-abx	posttest_inv_treat-referral	posttest_inv_treat-xpert	posttest_inv_treat-posttest_other	posttest_inv_treat_other	algorithm	algorithm_yn	symp_cause	symp_dx	symp_facility_dx	posttest_noanswer	pretest_occup	pretest_occup_other	pretest_income_personal
wwie_1_625	1	1	625	32	1	0	1	1	3	1 8		1	8	1	1	1	0	0	0	0	0	0	1	0		6	0	1	1	1	1	5	1	0	1	1	0	0	0		2	1	0			Symptoms went away after treatment but didn't know what for	4		500000
wwie_4_71	1	1	71	80	1	1	1	0	3	1		4	8	2	1	1	0	0	0	0	0	1	0	0		4	0	0	0	0	0	0	0									0	0			Symptoms went away with treatment	4		15000
wwie_1_687	1	1	687	77	1	0	1	1	4	2 3 8		1	9	2	1	1	0	0	0	0	0	1	0	1	Anorexia	9	0	1	0	0	1	3	0									0	1	Chronic bronchitis	8		5		50000
wwie_3_370	1	2	370	70	1	1	1	0	1	2		3	9	2	1	1	0	0	0	0	1	0	0	1	General weakness	13	0	1	0	0	0	0	1	0	1	1	0	0	0		2	1	0			I got tired of moving and coughing stopped	4		120000
wwie_4_284	1	2	284	32	0	1	1	0	0			4	9	2	1	1	0	0	0	0	0	0	0	0		11	0	1	1	1	1	0	1	0	1	1	0	0	0		2	1	0			Cough subsided	9		90000
wwie_2_356	1	1	356	34	0	0	1	1	1	1		2	9	2	0	1	0	1	0	0	0	0	0	1	Headache	3	0	1	1	1	1	1	1	0	0	1	0	0	0		1	1	1	Pneumonia	1		9		100000
wwie_3_313	1	1	313	51	1	1	1	0	0			3	9	2	0	1	0	0	0	0	0	0	0	0		0	0	0	0	0	1	1	1	0	1	1	0	0	0		2	1	1	Chest infection	1		4		250000
wwie_2_808	1	1	808	42	0	0	1	1	4	4		2	9	2	1	1	0	0	0	0	0	0	0	1	General body pain.	4	0	1	0	0	1	2	1	0	1	1	0	0	0		2	1	1	Work related cough	1		3		140000
wwie_1_807	1	1	807	28	1	0	1	1	10	0 1 6 8		1	9	2	1	1	0	0	0	0	0	0	0	0		0	0	1	0	0	1	3	1	0	1	1	0	0	0		2	1	1	Allergic cough	1		9	"Hustling"	500000
wwie_2_931	1	2	931	25	0	0	1	1	1	1		2	9	2	1	1	0	0	0	0	0	1	0	0		3	0	1	1	1	0	0	1	0	1	1	0	0	0		2	1	1	Cough	1		2		120000
wwie_4_500	1	2	500	45	0	1	0					4	9	2																1												0	0
wwie_2_623	1	1	623	48	1	0	1	1	4	1 8		2	10	2	1	1	0	1	0	0	0	0	0	1	Chills	25	2	1	1	1	1	2	1	1	1	0	0	0	0		1	1	1	Tb	2		1		300000
wwie_4_285	1	1	285	29	0	1	1	0	5	1 2		4	10	2	1	1	0	0	0	0	1	0	0	0		8	0	1	0	0	1	3	1	0	1	1	0	0	0		2	1	0			No one knew the answer	8		100000
wwie_4_144	1	2	144	48	1	1	1	0	0			4	10	2	1	1	0	0	0	0	0	0	0	0		9	0	1	1	1	0	0	1	0	1	1	0	0	0		2	1	1	Chest infection	1		12	Fisherman	400000
wwie_1_173	1	1	173	25	1	1	1	1	6	1 2 4 7 8 9		1	10	1	1	1	0	1	0	0	0	0	0	0		4	0	0	0	0	1	3	1	0	1	1	0	0	0		2	1	0			Doesn't know what cause was. Hospital stay made him better.	4		347000
wwie_1_785	1	1	785	43	1	0	1	1	4	0 2 7		1	10	2	0	1	0	1	0	0	0	0	0	0		6	0	1	1	1	1	1	0									0	0			No money	9		1120000
wwie_1_749	1	1	749	33	0	0	1	1	2	2		1	10	2	1	1	0	0	0	0	0	0	0	0		23	0	1	1	1	1	2	1	0	1	1	0	0	0		2	1	0			Cough stopped	5		50000
wwie_3_154	1	1	154	45	0	1	1	0	1	1		3	10	2	1	1	0	1	1	0	0	0	1	0		32	2	1	1	1	1	1	1	0	1	1	0	0	0		2	1	1	Tb	1		4		16500
wwie_4_115	1	1	115	55	1	1	1	1	3	0 1		4	10	2	0	0	0	0	0	0	0	0	0	1	Haematochezia, dermatitis	16	0	1	1	1	0	0	0									0	1	HIV POSITIVE	0		12	Fisherman	200000
wwie_2_15	1	1	15	40	0	0	1	1	8	1 8 9		2	10	2	1	1	0	0	0	0	0	0	0	1	Fatigue	4	0	1	0	0	1	7	1	1	1	1	1	0	0		4	1	1	Pneumonia	2		1		400000
wwie_4_549	1	1	549	40	0	1	1	1	5	1 4 5		4	10	2	1	1	0	0	0	0	0	1	0	0		44	2	1	0	0	1	2	0									0	1	TB	1		4		10000
wwie_3_498	1	2	498	40	0	1	1	0	10	1		3	10	2	1	1	0	1	0	0	1	0	0	0		4	0	1	0	0	1	7	1	0	1	1	0	0	0		2	1	0			No one told me the answer	2		120000
wwie_4_482	1	2	482	44	1	1	1	1	3	8		4	10	2	0	1	0	1	0	0	0	0	0	0		7	0	1	1	1	0	0	1	0	1	1	0	0	0		2	1	0			I trusted the meds given to me by the Dr	4		150000
wwie_4_246	1	1	246	42	0	1	1	1	3	8		4	10	2	1	1	1	1	0	0	0	0	0	0		4	0	0	1	1	0	0	1	0	1	1	0	0	1	Referred to HIV clinic	2	1	1	Hiv	8		4		800000
wwie_3_700	1	2	700	65	0	1	1	1	7	1 2		3	10	2	0	1	1	0	0	0	0	0	0	0		4	0	1	0	0	1	1	1	0	1	1	0	0	0		2	1	1	Pneumonia	1		4		40000
wwie_3_600	1	2	600	53	0	1	1	0	3	1 2 3 5		3	10	2	1	1	1	1	0	0	1	0	0	0		3	0	1	1	1	0	0	1	0	1	1	0	0	0		2	1	0			Not told to return	4		15000
wwie_2_585	1	1	585	32	0	0	1	1	0			2	10	2	1	1	0	0	0	0	0	1	0	0		1	0	1	1	1	0	0	1	0	1	1	0	0	0		2	1	1	Chest infection	1		4		150000
wwie_1_674	1	1	674	28	1	0	1	1	4	1 8		1	11	2	1	1	1	1	0	0	1	0	0	0		21	0	1	0	0	1	10	1	0	1	1	0	0	0		2	1	0			No one can find an answer	1		1000000
wwie_4_944	1	2	944	44	0	1	1	0	3	0		4	11	2	0	1	0	0	1	0	0	0	0	0		8	0	1	1	1	0	0	1	0	1	1	0	0	0		2	1	0			It was too far	2	Fishmonger	1000000
wwie_4_675	1	1	675	53	0	1	1	1	4	1 8		4	11	2	1	1	0	0	0	0	0	1	0	1	Epistaxis	17	0	1	1	2	0	0	0									0	0			No money for further investigation	4		400000
wwie_2_589	1	2	589	20	0	0	1	1	3	1		2	11	2	0	1	0	0	1	1	0	0	1	0		23	2	1	0	0	1	2	0									0	0			Was busy	0		0
wwie_4_7	1	2	7	56	1	1	1	0	4	8		4	11	2	1	1	0	1	0	0	0	0	0	1	General weakness	4	0	1	1	1	0	0	1	0	1	1	0	0	0		2	1	1	Smoking	1		12	Fisherman	2500000
wwie_4_437	1	2	437	39	1	1	1	1	3	8		4	11	2	1	1	0	0	0	0	1	0	0	0		4	0	1	1	1	0	0	1	0	1	1	0	0	0		2	1	1	Working hard as a fisherman	1		12	Fisherman	300000
wwie_3_346	1	2	346	60	0	1	1	0	4	1		3	11	2	1	1	0	0	0	0	0	0	0	0		4	0	0	1	1	0	0	1	0	0	1	0	1	0		2	1	1	Hiv related chest infection	1		4		180000
wwie_2_416	1	1	416	33	1	0	1	1	6	2 4 6		2	11	2	1	1	0	1	0	0	0	0	0	0		2	0	1	0	0	0	0	1	0	1	1	0	0	0		2	1	1	Work related cough	1		2		600000
wwie_3_567	1	2	567	38	1	1	1	1	10	0 1 5 8		3	12	1	0	1	0	1	0	0	0	0	0	0		2	0	0	1	1	0	0	1	0	1	1	0	0	0		2	1	1	HIV	1		4		35000
wwie_3_685	1	2	685	52	0	1	1	0	5	8		3	12	1	1	1	0	0	0	0	0	0	0	0		3	0	1	1	1	1	2	1	0	1	1	0	0	0		2	1	0			Chest infection	4		8300
wwie_1_997	1	1	997	30	1	0	1	1	3	0 8		1	12	2	1	1	0	1	0	0	1	0	0	0		2	0	0	0	0	1	5	1	0	1	1	0	0	0		2	1	1	Pneumonia	1		2		350000
wwie_1_800	1	1	800	45	0	0	1	1	1	2		1	12	2	0	1	0	1	0	0	0	0	0	0		11	0	1	0	2	1	1	0									0	0			Taking her medicine	2	Runs her own shop	900000
wwie_1_827	1	1	827	48	0	0	1	1	3	2 4 5		1	12	2	1	1	0	0	1	1	0	0	0	1	No appetite	2	0	1	1	1	1	1	1	0	0	1	0	0	0		1	1	0			Had the meds prescribed	4	Subsistence farmer. Children give her money	50000
wwie_1_590	1	1	590	52	1	0	1	1	4	1 2 3		1	12	2	1	1	0	1	0	0	1	0	0	0		3	0	1	0	0	0	0	0									0	0			Symptoms stopped	2		224000
wwie_4_154	1	1	154	52	1	1	1	1	3	1		4	12	2	1	1	1	0	0	0	0	0	0	1	Fatigue	26	0	0	0	0	0	0	0									0	1	Pneumonia	1		4		300000
wwie_2_518	1	1	518	24	0	0	1	1	3	1		2	12	2	1	1	0	0	0	0	1	0	0	0		9	0	1	1	1	0	0	1	0	0	1	0	0	0		1	1	1		1		9		450000
wwie_4_773	1	1	773	48	1	1	1	0	0			4	12	1	1	1	0	1	0	1	0	0	0	0		49	2	1	1	1	1	2	1	0	0	0	0	0	0		0	0	1	Tb	1		12	Fisherman	600000
wwie_1_3	1	1	3	24	1	0	1	1	3	1 8		1	12	2	1	1	0	0	0	1	1	0	0	1	Headache	1	0	1	0	0	1	1	1	0	1	1	0	0	0		2	1	0			Symptoms stopped	9		200000
wwie_1_571	1	2	571	25	0	1	1	0	0			1	12	2	0	1	0	0	0	0	1	1	0	0		1	0	1	0	0	0	0	0									0	0			I was not ill	9		800000
wwie_2_999	1	2	999	42	1	0	0					2	12	2																1												0	0
wwie_3_723	1	2	723	37	1	1	0					3	12	2																1												0	1	Died of Hiv progression
wwie_3_957	1	1	957	85	1	1	1	0	6	1 2 5		3	13	2	1	1	1	0	0	0	1	0	0	0		46	2	1	0	0	1	4	1	0	1	1	0	0	0		2	1	1	TB	1		4		50000
wwie_1_734	1	1	734	34	1	0	1	1	2	1		1	13	1	1	1	0	1	1	1	0	0	0	0		59	0	1	1	1	1	3	1	0	1	1	0	0	0		2	1	0			Nothing has cured them completely	9		150000
wwie_2_12	1	2	12	37	1	0	1	0	7	1 6 8 9		2	13	2	0	1	0	0	0	0	1	0	1	0		13	0	1	1	1	1	4	1	0	0	1	0	0	0		1	1	0			Was transferred	1	Plumber	1000000
wwie_3_628	1	2	628	37	0	1	1	0	5	1		3	13	2	0	1	0	0	0	0	1	0	0	0		4	0	1	0	0	1	1	1	0	1	1	0	0	0		2	1	0			Symptoms stopped	9		30000
wwie_2_275	1	1	275	50	0	0	1	1	5	1 4 6 7 8		2	13	2	1	1	0	0	0	1	1	0	0	0		4	0	1	0	0	1	1	1	0	1	1	0	0	0		2	1	0			Symptoms stopped	9		900000
wwie_1_159	1	2	159	20	0	1	1	1	1	1		1	13	2	0	1	0	1	0	0	1	0	0	1	Shivering	5	0	1	0	0	1	1	1	0	1	1	0	0	0		2	1	1	Chest infection	1		0		0
wwie_2_220	1	1	220	35	0	0	1	1	3	1		2	13	2	1	1	0	0	0	0	1	0	0	0		1	0	1	1	1	1	1	1	0	1	1	0	0	0		2	1	1	Chest infection	1		9		1500000
wwie_4_458	1	2	458	24	0	1	1	1	0			4	13	2	0	1	0	1	0	0	1	0	0	0		1	0	0	1	1	0	0	0									0	0			The cough stopped	9		350000
wwie_3_10	1	2	10	58	1	1	0					3	14	2																2												0	1	Bowel distension ?hernia
not_traced_1	1	0		32	0	0	1	1				2		2																0
not_traced_2	1	0		39	0	0	1	0				2		2																1
not_traced_3	1	0		9	0	1	1	1				1		2																2
not_traced_4	1	0		34	0	0	1	1				1		2																1
not_traced_5	1	0		39	0	1	1	1				3		2																1
not_traced_6	0	2			1	1						3		1																1
not_traced_7	0	2		26	1	1						4		2																2
not_traced_8	0	2		36	0	0						2		2																2
not_traced_9	0	2		30	1	0						1		2																0
not_traced_10	0	2		22	0	0						1		2																0
not_traced_11	0	2		20	1	0						2		2																0
not_traced_12	0	2		24	0	0						2		2																0
not_traced_13	0	2		22	0	0						2		2																0
not_traced_14	0	2		20	0	1						3		2																1
not_traced_15	0	2		26	0	1						3		2																0
not_traced_16	0	2		22	0	1						3		2																1
not_traced_17	0	2		50	0	1						3		2																0
not_traced_18	0	2		39	1	1						4		2																2
[truncated: 397 more columns]
